# Supplementary material for: BET-inhibition by JQ1 promotes proliferation and self-renewal capacity of hematopoietic stem cells
Source: PubMed Central journal article supplement — Haematologica. 2018 Mar 22;103(6):939–48. doi: 10.3324/haematol.2017.181354 (PMC6058788; doi:10.3324/haematol.2017.181354), 2018-06
Supplement: 2017_181354-Disclosures_and_Contributions.pdf [file 2017_181354-Disclosures_and_Contributions.pdf]

Haematologica  
HAEMATOL/2017/181354  
Version 3

BET-inhibition by JQ1 promotes proliferation and self-renewal capacity  
of hematopoietic stem cells

Mark Wroblewski, Marina Scheller-Wendorff, Florian Udonta, Raimund Bauer, Jara Schlichting, Lin Zhao, Isabel Ben Batalla, Victoria Gensch, Sarina Päsler, Lei Wu, Marek Wanior, Hanna Taipaleenmäki, Simona Bolamperti, Zeynab Najafova, Klaus Pantel, Carsten Bokemeyer, Jun Qi, Eric Hesse, Stefan Knapp, Steven Johnsen, and Sonja Loges

Disclosures: SL received research funding, advisory board honoraria, speaker honoraria and travel support from Roche and Lilly. SL received advisory board honoraria, speaker honoraria and travel support from Boehringer Ingelheim, AstraZeneca, Bristol-Myers Squibb, Novartis, Roche, Lilly and MSD. MWr received advisory board honoraria and travel support from Lilly. The remaining authors declare no competing financial interests.

Contributions: SL conceived and supervised the study. MWr, MSW, FU, RB, SP, LW, JS, LZ, IBB, VG, MWa, HT, SB and ZN did the experiments. MWr, MSW, VG, MWa, HT, SB and SL analyzed data. All authors were involved in data interpretation and in the writing of the manuscript. MWr and MSW contributed equally to this work.
