# Supplementary material for: BET-inhibition by JQ1 promotes proliferation and self-renewal capacity of hematopoietic stem cells
Source: PubMed Central journal article supplement — Haematologica. 2018 Mar 22;103(6):939–48. doi: 10.3324/haematol.2017.181354 (PMC6058788; doi:10.3324/haematol.2017.181354), 2018-06
Supplement: HAEMATOL-2017-181354v3-Wroblewski-01.pdf [file HAEMATOL-2017-181354v3-Wroblewski-01.pdf]

# The beneficial effects of bromodomain and extra-terminal domain (BET) protein inhibition in myelosuppressive conditions

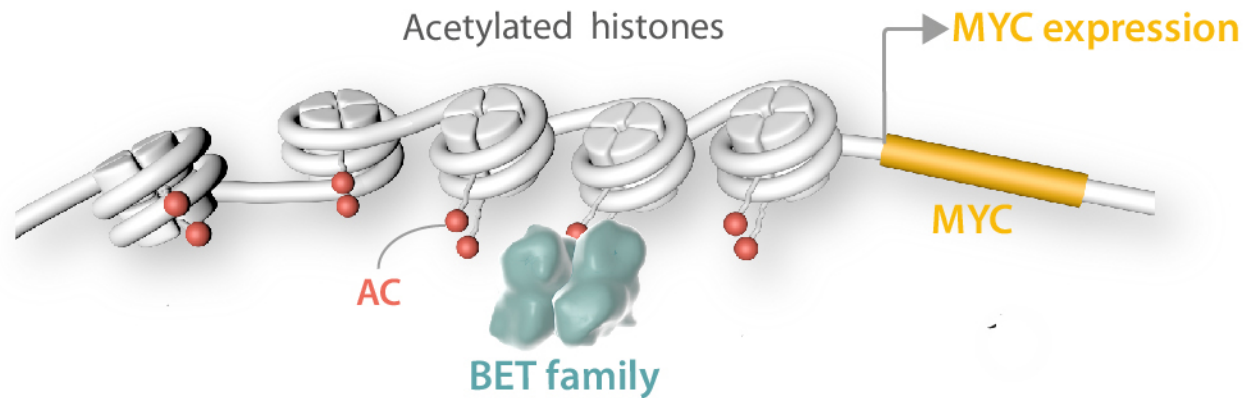

HEMATOLOGICAL MALIGNANCIES: myeloid leukemia, lymphoma, multiple myeloma

## BET inhibitor JQ1

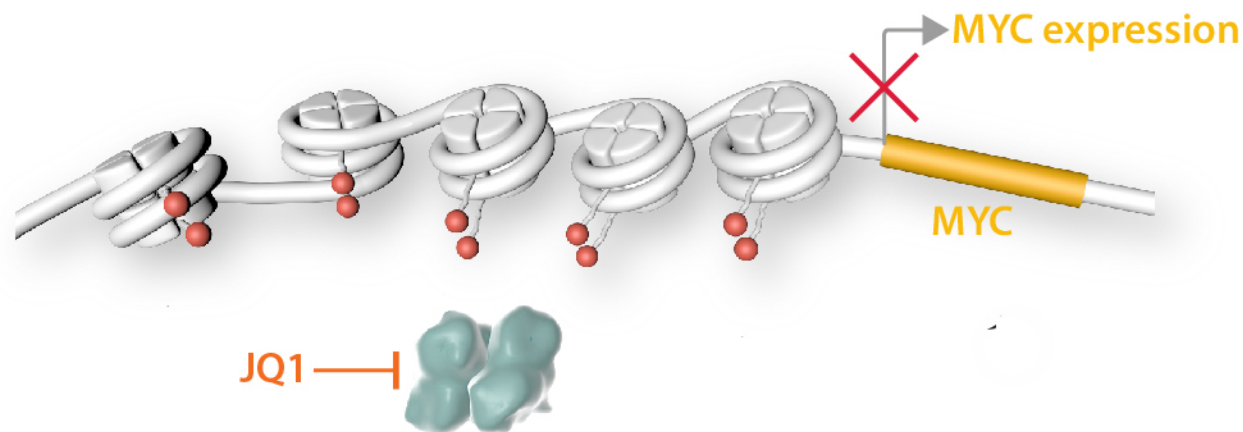

- ↓ numbers of pre-, immature and mature B cells
- ↑ apoptosis in T cells
- ↓ cellularity in thymus, bone marrow and spleen
- ↑ proliferation of long-term hematopoietic stem cells
- ↑ apoptosis in T cells
- ↑ engraftment of hematopoietic stem cells
